# Supplementary material
Source: PubMed Central journal article supplement (PMC2818689)
Supplement: me.2009-0055_1.pdf [file me.2009-0055_1.pdf]

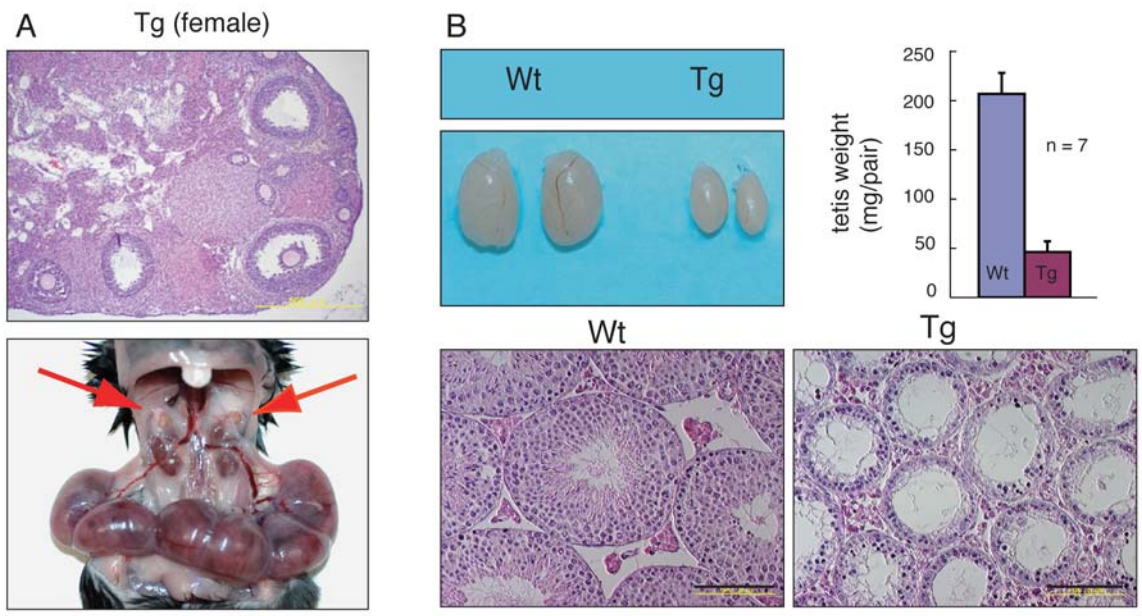

**Supplemental Figure**

Effect of Ad4BP/SF-1 over-expression on gonadal development and function. (A) Ovaries in an adult FAdE-Ad4BP-(Ad4BP/SF-1) Tg female. The top panel shows the histology of the ovary in an adult female with the FAdE-Ad4BP-(Ad4BP/SF-1) Tg. Note the presence of follicles at multiple stages of maturation, including corpora lutea. (B) Testes in an adult FAdE-Ad4BP-(Ad4BP/SF-1) Tg male. Note the decreased testes size and the failure of sperm maturation.
